# Supplementary material
Source: PubMed Central journal article supplement (PMC4450316)
Supplement: mmc3.pdf [file mmc3.pdf]

# Suppl. Figure S3

**A**

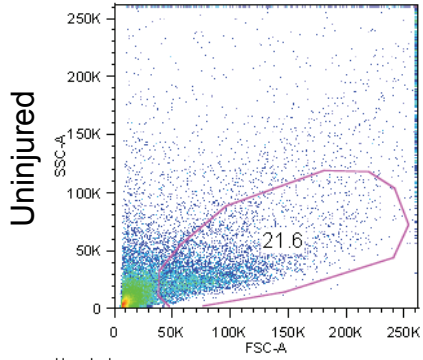

Ungated  
Set 1\_Tube\_010.fcs  
Event Count: 24833

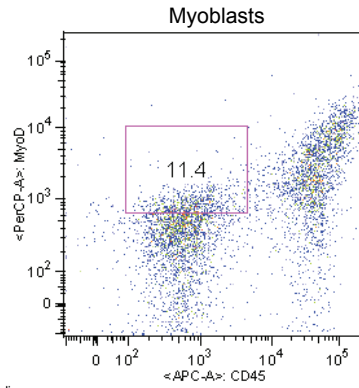

live  
Set 1\_Tube\_010.fcs  
Event Count: 5357

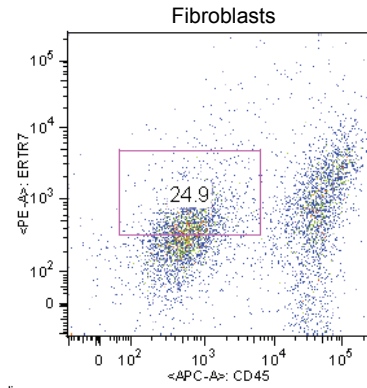

live  
Set 1\_Tube\_010.fcs  
Event Count: 5357

**72 hr**

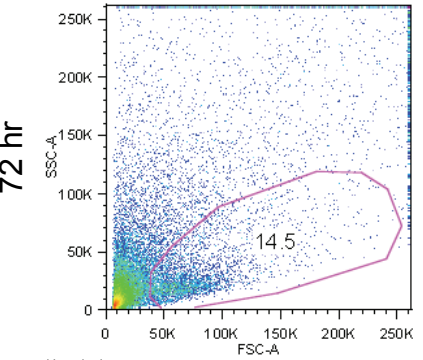

Ungated  
Set 1\_Tube\_008.fcs  
Event Count: 25065

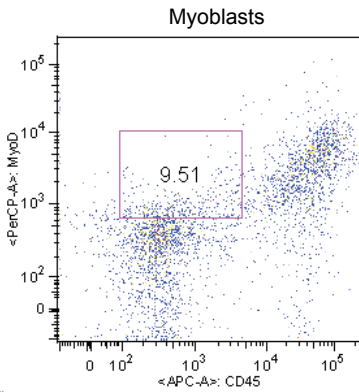

live  
Set 1\_Tube\_008.fcs  
Event Count: 3627

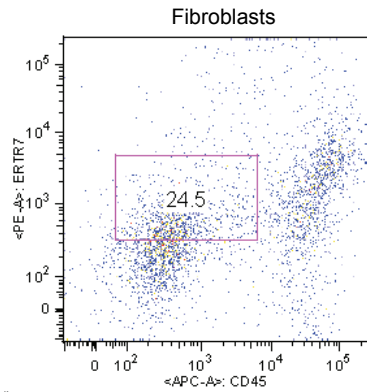

live  
Set 1\_Tube\_008.fcs  
Event Count: 3627

**B**

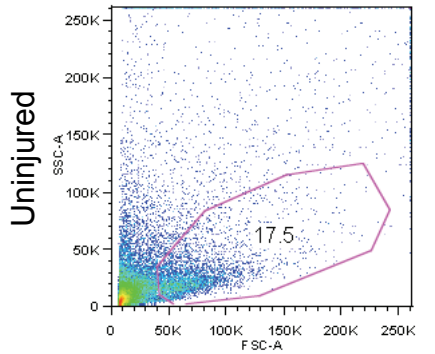

Ungated  
Set 2\_Tube\_012.fcs  
Event Count: 25333

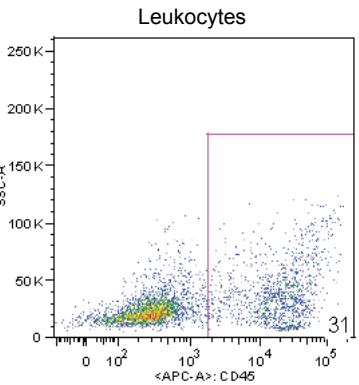

live  
Set 2\_Tube\_012.fcs  
Event Count: 4430

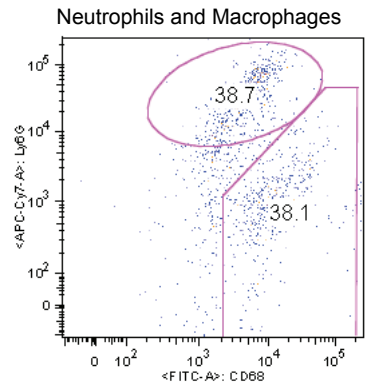

CD45+  
Set 2\_Tube\_012.fcs  
Event Count: 1372

**72 hr**

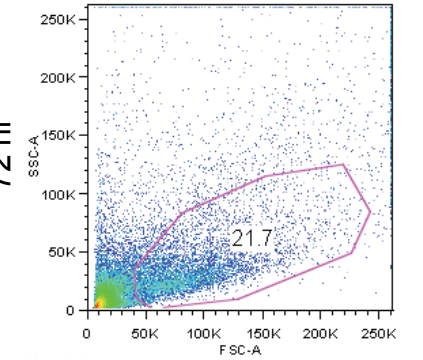

Ungated  
Set 2\_Tube\_014.fcs  
Event Count: 30585

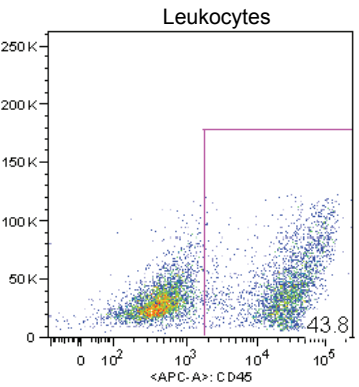

live  
Set 2\_Tube\_014.fcs  
Event Count: 6642

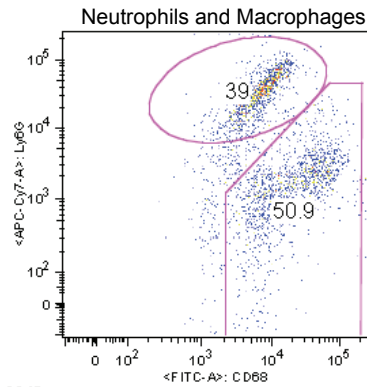

CD45+  
Set 2\_Tube\_014.fcs  
Event Count: 2907
