# Supplementary material
Source: PubMed Central journal article supplement (PMC4450316)

# Suppl. Figure S1

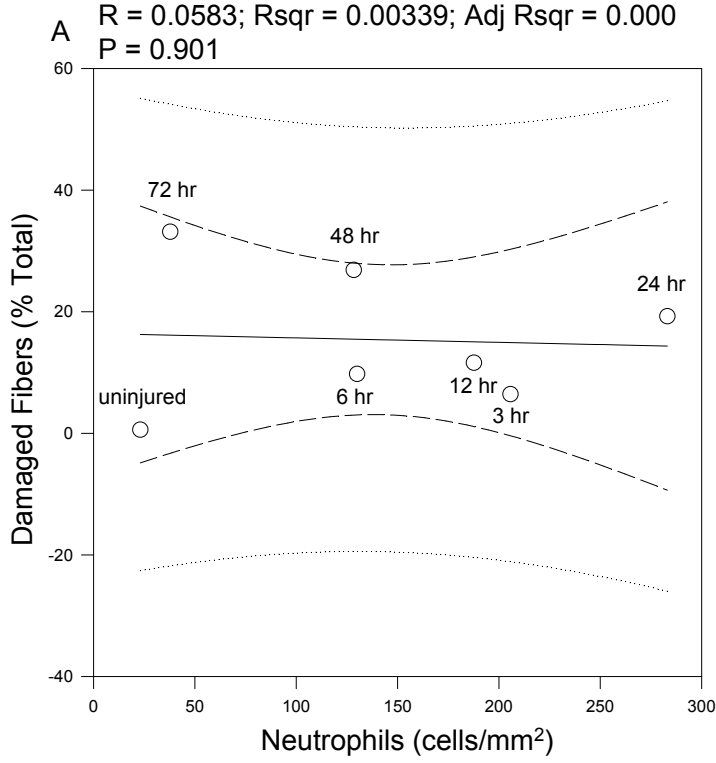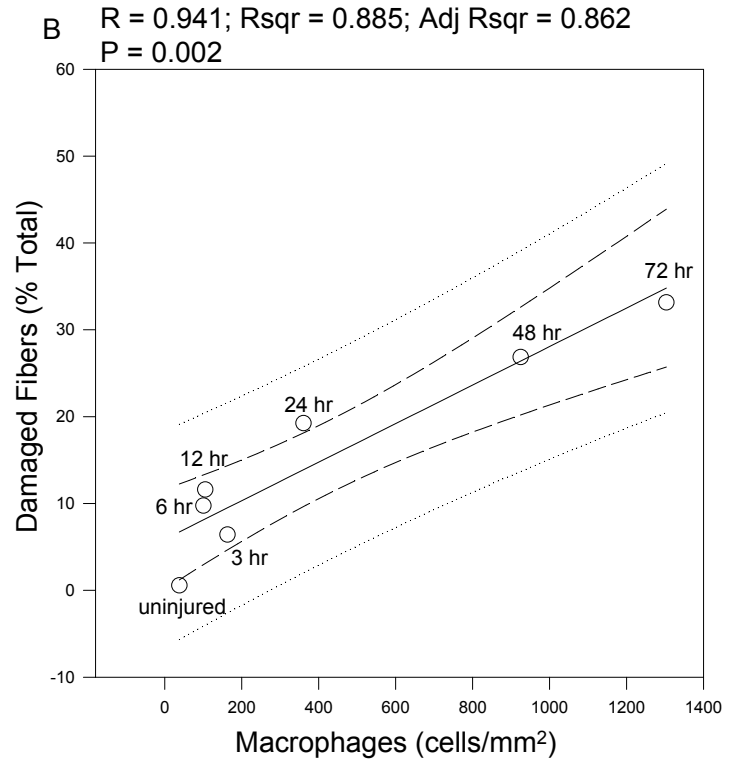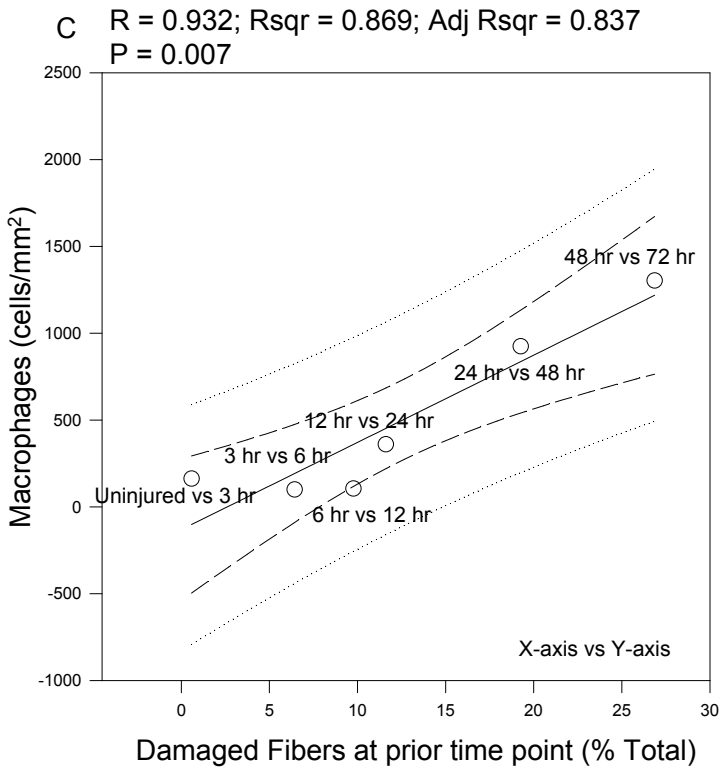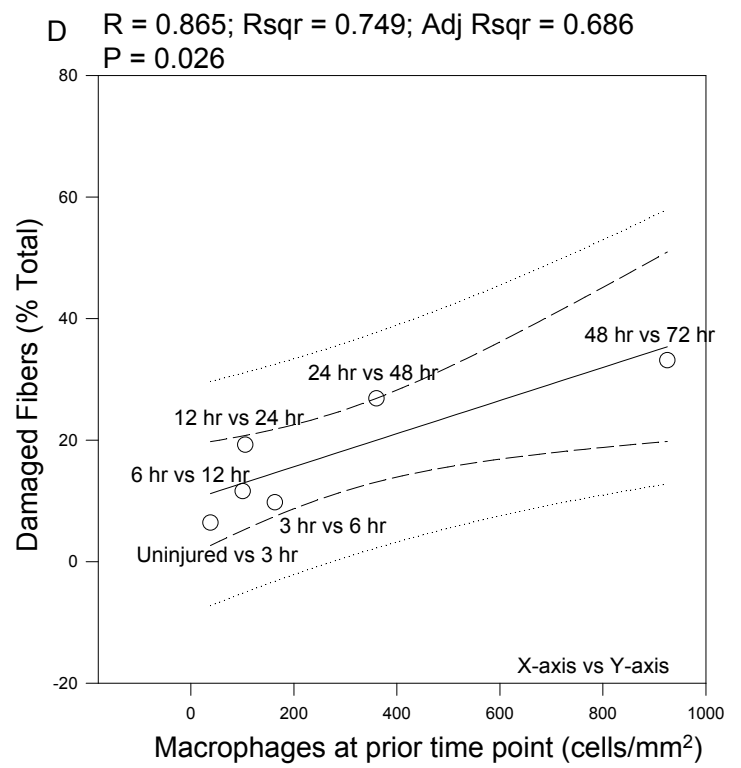

Supplement: mmc1.pdf [file mmc1.pdf]

Suppl. Figure S2

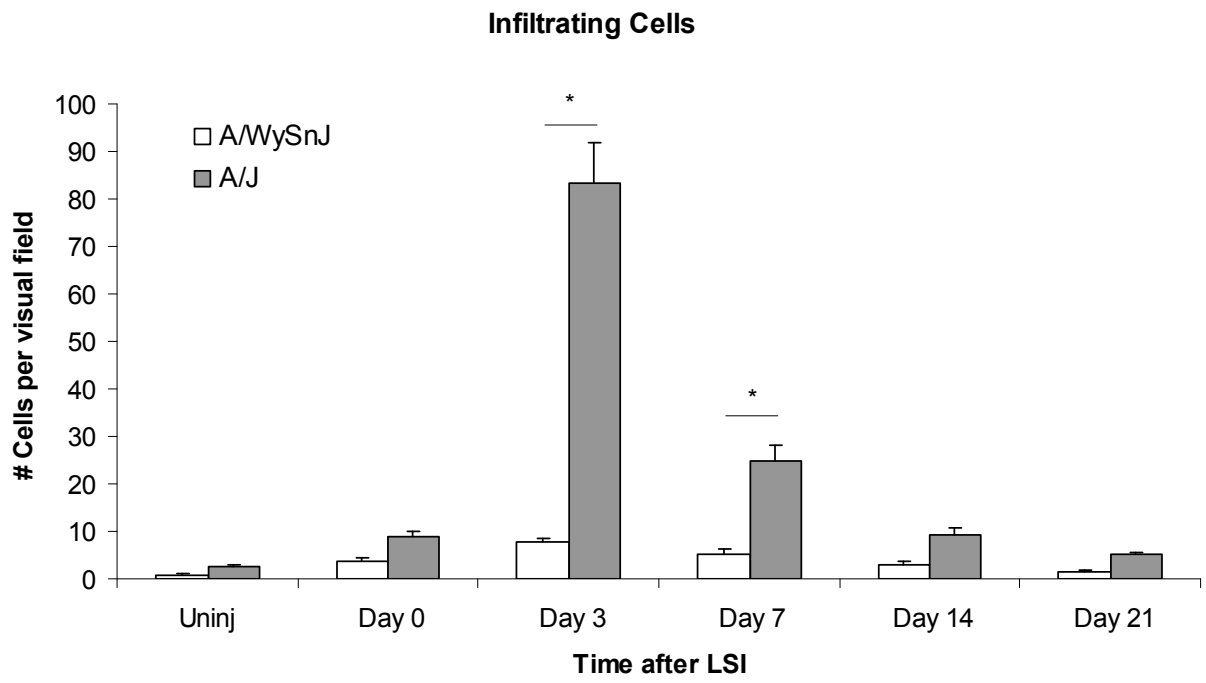

Supplement: mmc2.pdf [file mmc2.pdf]

# Suppl. Figure S4

A

Uninjured

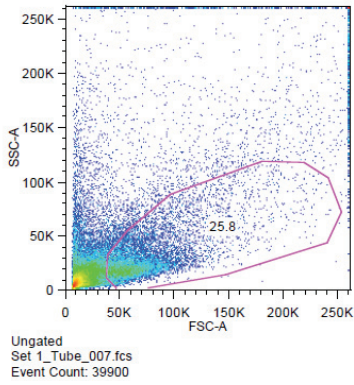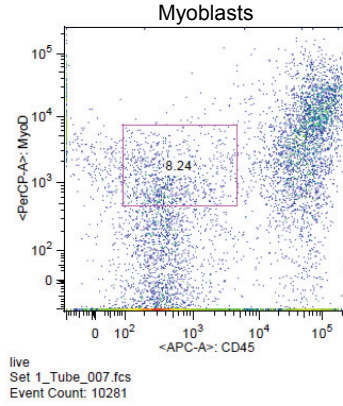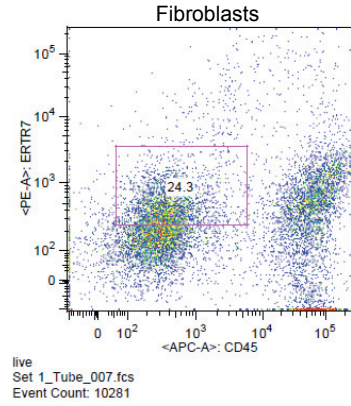

72 hr

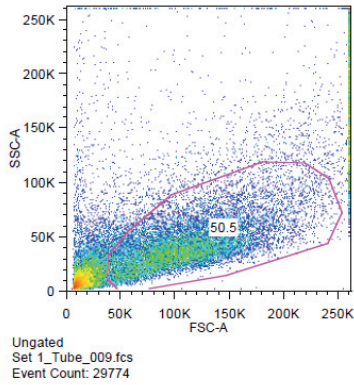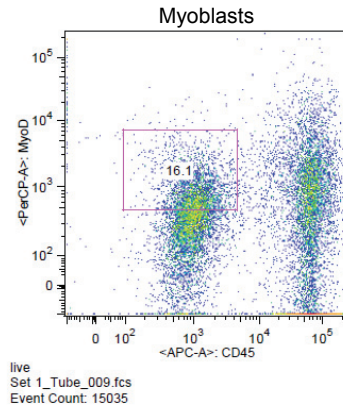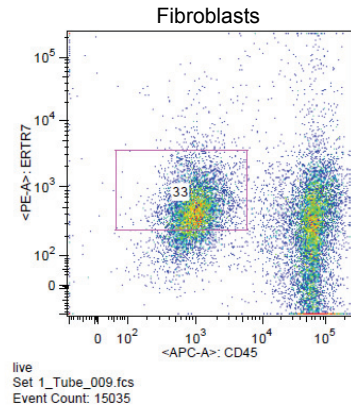

B

Uninjured

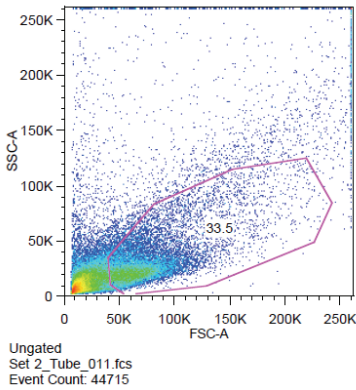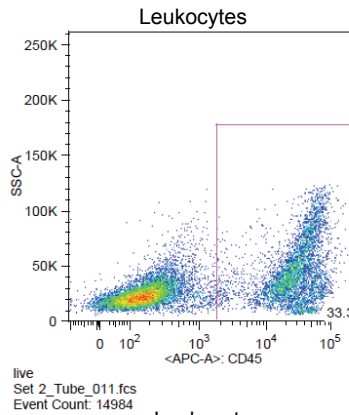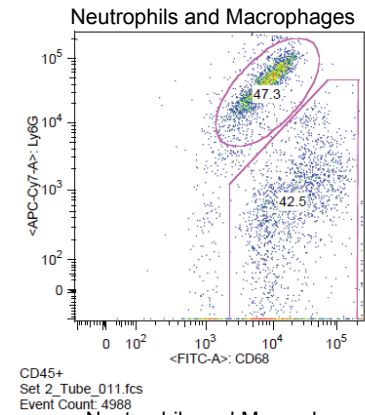

72 hr

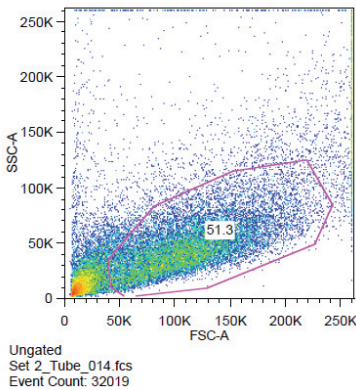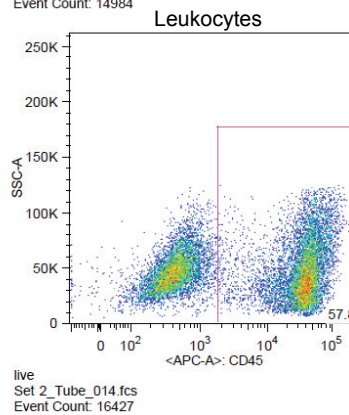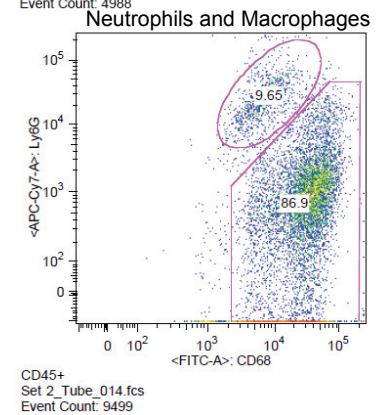

Supplement: mmc4.pdf [file mmc4.pdf]

# Suppl. Figure S5

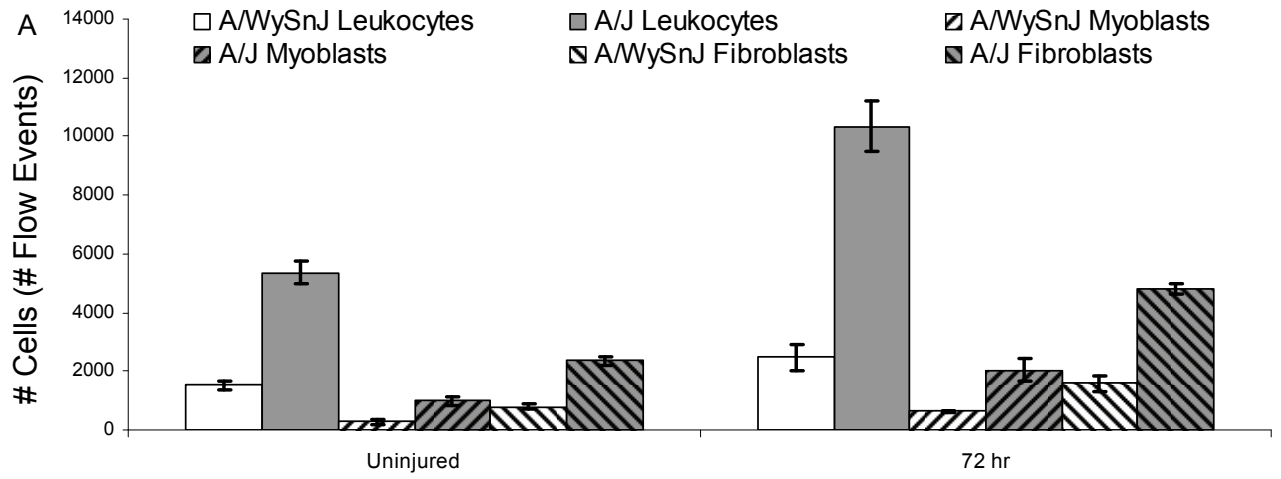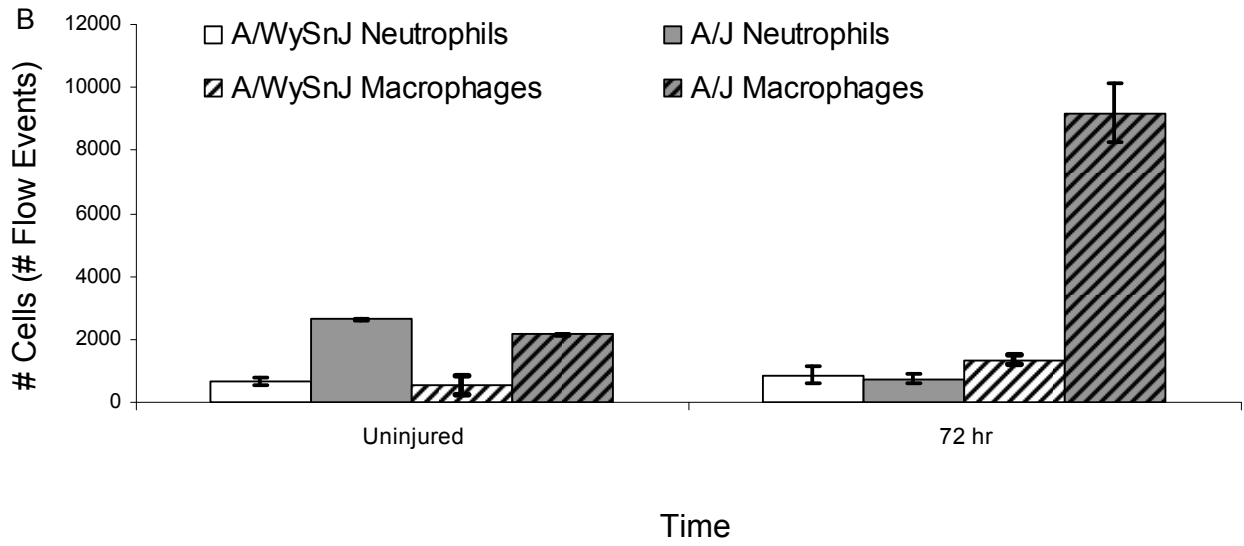

Supplement: mmc5.pdf [file mmc5.pdf]

Suppl. Figure S6

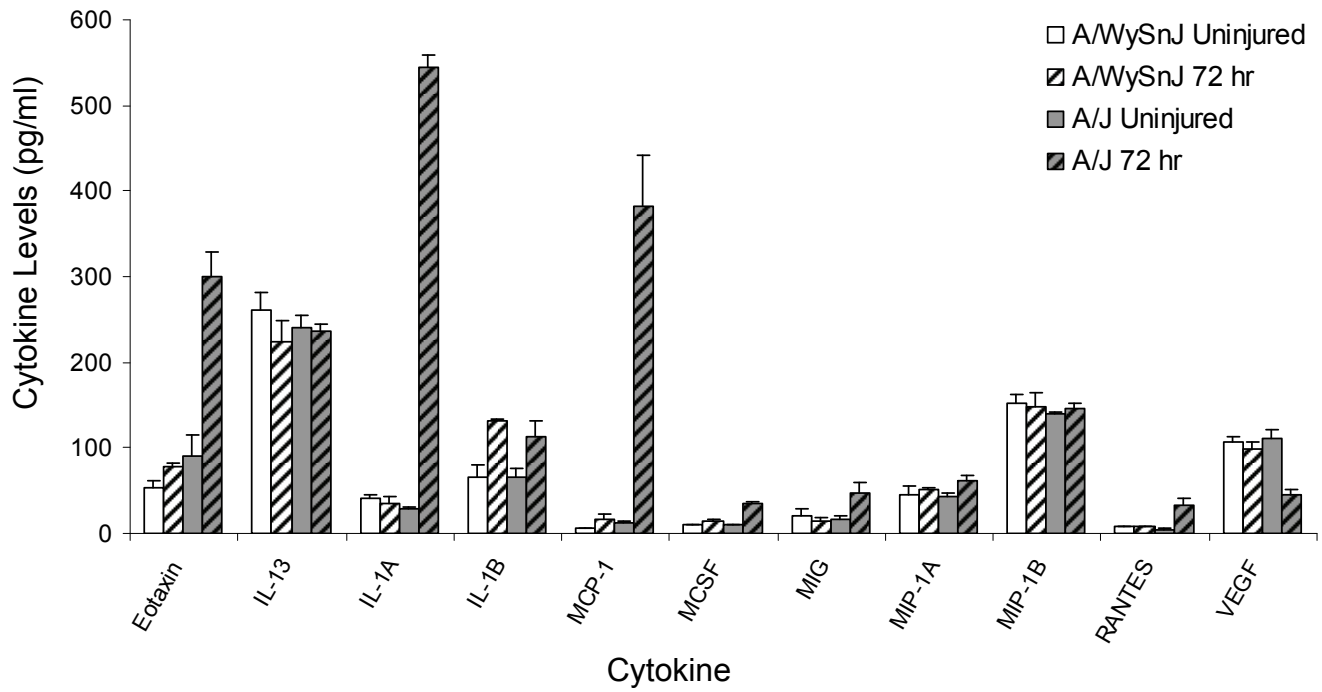

Supplement: mmc6.pdf [file mmc6.pdf]

Suppl. Figure S7

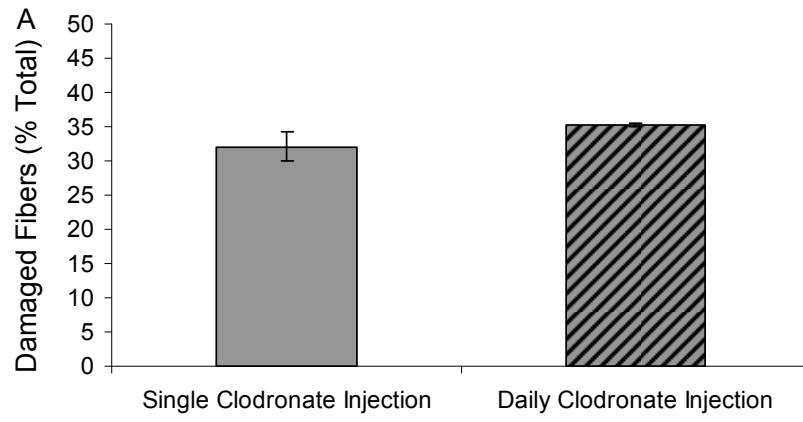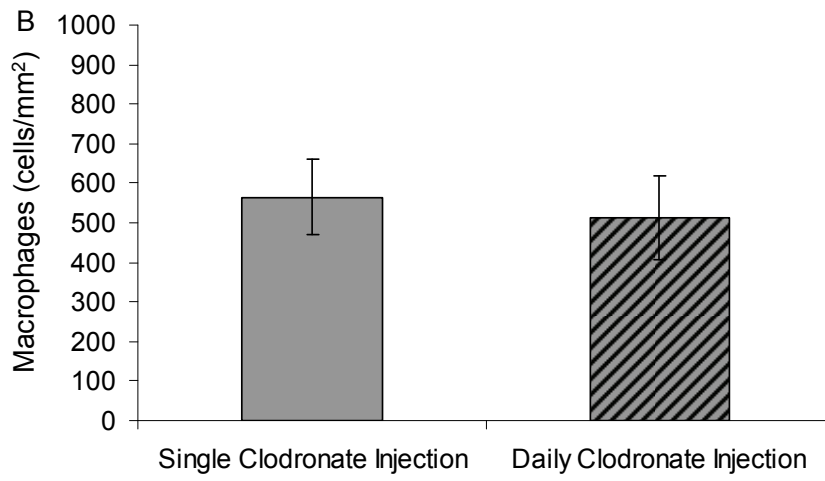

Supplement: mmc7.pdf [file mmc7.pdf]
